# Supplementary material for: An ionically cross-linked composite hydrogel electrolyte based on natural biomacromolecules for sustainable zinc-ion batteries
Source: Royal Society of Chemistry journal article supplement (doi:10.1039/d4nh00243a), 2024-01-01
Supplement: d4nh00243a1.pdf [file d4nh00243a1.pdf]

1

2

## Supporting Information for

3

4

### **An Ionically Crosslinked Composite Hydrogel Electrolyte Based on**

5

### **Natural Biomacromolecules for Sustainable Zinc-Ion Batteries**

6 Haoyang Ge,<sup>a</sup> Liping Qin,<sup>b,\*</sup> Bingyao Zhang,<sup>a</sup> Long Jiang,<sup>c</sup> Yan Tang,<sup>a</sup> Bingan Lu,<sup>d</sup> Siyu Tian<sup>a,\*</sup>

7 and Jiang Zhou<sup>a,\*</sup>

8 a School of Materials Science and Engineering, Hunan Provincial Key Laboratory of Electronic  
9 Packaging and Advanced Functional Materials, Central South University, Changsha 410083,  
10 China. EMAIL: sytian2016@163.com; zhou\_jiang@csu.edu.cn

11 b College of Biological and Chemical Engineering, Guangxi University of Science and  
12 Technology,

13 Liuzhou 545006, Guangxi, China. EMAIL: qinlp2005@126.com

14 c State Key Laboratory of Oil and Gas Equipment, CNPC Tubular Goods Research Institute,  
15 Xi'an 710077, China.

16 d School of Physics and Electronics, Hunan University, Changsha 410082, China.

17

18

## 1 **Experimental section**

2 **Preparation of ISG hydrogel electrolyte:** Typically, 0.5 g of iota-carrageenan (AR grade,  
3 Aladin), 0.2 g of sodium alginate (AR grade, Macklin) and 1mg of graphene oxide (GO) were  
4 mixed with 20 mL of deionized water and stirred at 60 °C for 4 h until a brown homogenous  
5 solution was obtained. The as-prepared solution was held at 60 °C for 20 min and then poured  
6 into a glass petri plate for cooling. Finally, the obtained hydrogel was immersed in 2 M ZnSO<sub>4</sub>  
7 overnight until the hydrogel was cross-linked completely. The obtained hygroscopic composite  
8 hydrogel electrolyte was denoted as ISG.

9

10 **Synthesis of NH<sub>4</sub>V<sub>4</sub>O<sub>10</sub>:** The 1.404 g NH<sub>4</sub>VO<sub>3</sub> was added into 60 mL of deionized water under  
11 continuous magnetic stirring at 80 °C for 20 min. Then 2.2692 g of H<sub>2</sub>C<sub>2</sub>O<sub>4</sub>·2H<sub>2</sub>O solid  
12 powders were added to the above-mentioned solution and stirred for 30 min. Subsequently, the  
13 above solution was transferred to a Teflon-lined autoclave and kept in an oven maintained at  
14 140 °C for 48 h. Finally, the collected powders were washed repeatedly with deionized water  
15 and then dried at 60 °C for 12 h.

16

17 **Materials characterizations Structural:** characterizations of the samples were performed by  
18 X-ray diffraction (XRD) in the detected angular range of 5-80° (Rigaku Mini Flex 600  
19 diffractometer, Cu Ka radiation,  $k = 1.5418 \text{ \AA}$ ). The morphologies were characterized by a field  
20 emission scanning electron microscope (FESEM, FEI Nova Nano SEM 230, 10 kV) equipped  
21 with an energy-dispersive X-ray spectroscopy (EDS) analyzer. Active species of the composite  
22 hydrogel electrolyte were identified by Fourier Transform Infrared Spectrometer (FTIR,  
23 Nicolet 6700).

24

25 **Electrochemical characterization:** In preparation of the cathodes, a mixture of NH<sub>4</sub>V<sub>4</sub>O<sub>10</sub> (70  
26 wt%), super P (20 wt%), polyvinylidene fluoride (PVDF, 10 wt%) and N-methyl-2-pyrrolidone  
27 (NMP) were pasted onto a stainless-steel mesh and dried in a vacuum oven at 80 °C for 12 h.  
28 CR2032 coin cells were assembled with the NH<sub>4</sub>V<sub>4</sub>O<sub>10</sub> cathode, ISG hydrogel electrolyte or 2 M  
29 ZnSO<sub>4</sub> liquid electrolyte and Zn anode to evaluate the electrochemical performance by a

1 multichannel battery testing system (LAND CT2001A). Particularly, a glass fiber separator  
2 was used when assembling full cells with the 2 M ZnSO<sub>4</sub> liquid electrolyte. All the cells were  
3 rested for 1 h before testing. The Zn||NVO coin cells cycled at 2 A g<sup>-1</sup> and the pouch cells  
4 cycled at 0.5 A g<sup>-1</sup> were activated at a current density of 0.2 A g<sup>-1</sup> for 2 cycles before testing.  
5 The cyclic voltammetry (CV) and electrochemical impedance spectroscopy (EIS) tests were  
6 conducted by an electrochemical workstation (CHI660E).

7

8 **Table S1 Detailed test procedures of Zn||Zn symmetric cells.**

| Test              | Current density<br>(mA cm <sup>-2</sup> ) | Capacity<br>(mA h cm <sup>-2</sup> ) |
|-------------------|-------------------------------------------|--------------------------------------|
| Plating/Stripping | 1                                         | 1                                    |
|                   | 0.2                                       | 0.2                                  |
|                   | 0.5                                       | 0.5                                  |
| Rate Capability   | 1                                         | 0.5                                  |
|                   | 2                                         | 0.5                                  |
|                   | 2.5                                       | 0.525                                |

9

10

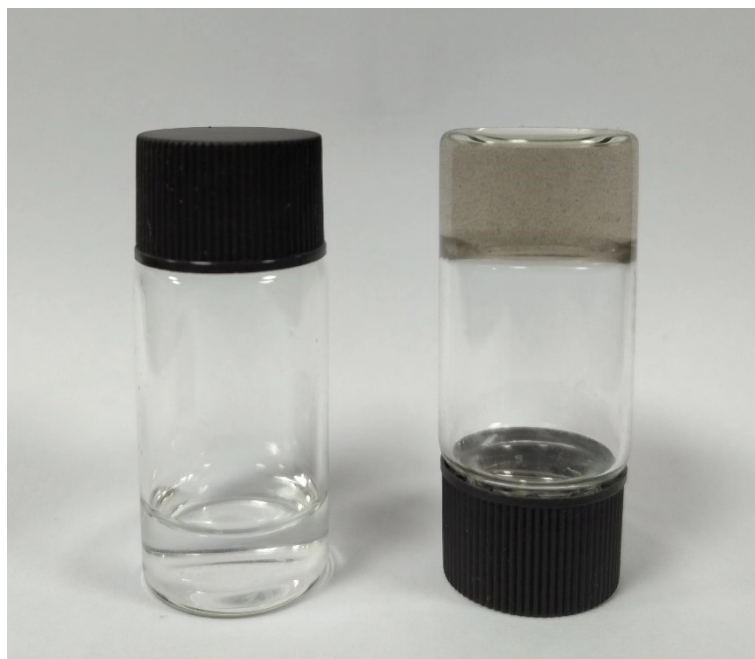

1

2 **Fig. S1 Optical images of the liquid electrolyte (left) and ISG hydrogel (right).**

3

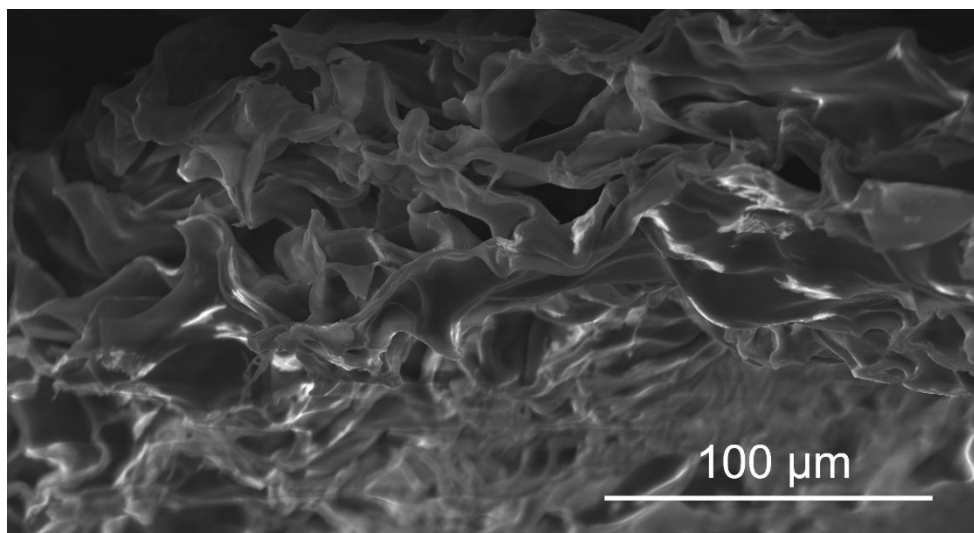

1

2 **Fig. S2 Cross-sectional SEM image of freeze-dried ISGHE.**

3

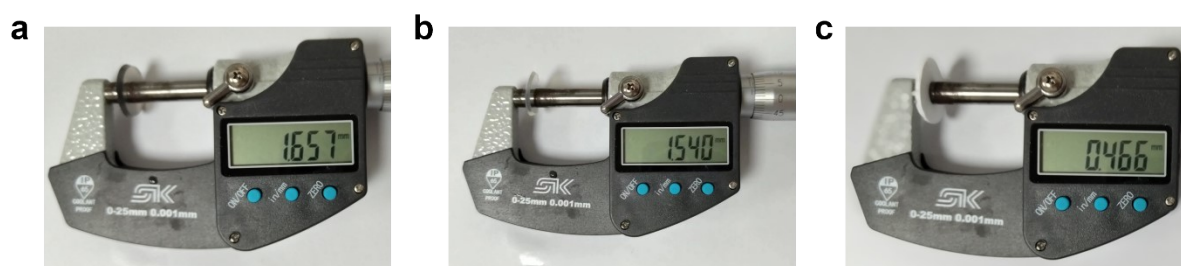

4

5 **Fig. S3 Thickness of (a) ISGHE and (b) glass fiber separator.**

6

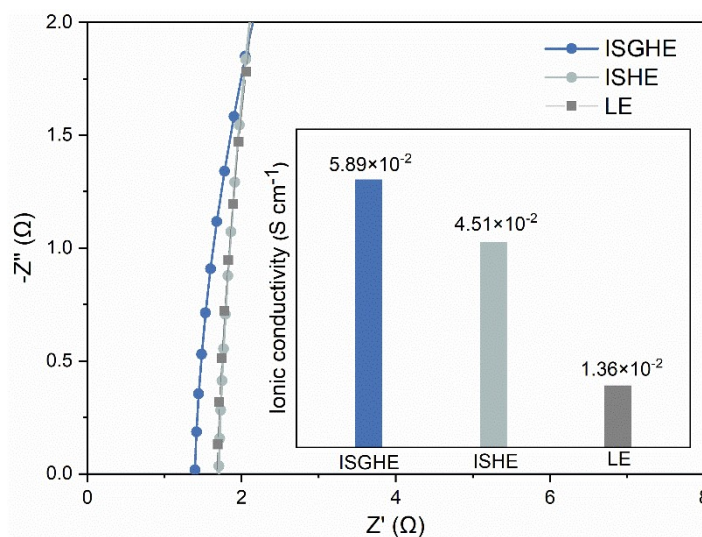

7

8 **Fig. S4 Ionic conductivity of ISGHE, ISHE and LE.**

9

1 **Calculation of ionic conductivity:**

2 The ionic conductivities of different electrolytes were calculated by the following  
3 equations:

4 ISGHE:  $\sigma = \frac{l}{RA} = \frac{0.1657}{1.4 \times 2.01} = 5.89 \times 10^{-2} S cm^{-1}$

5 ISGE:  $\sigma = \frac{l}{RA} = \frac{0.154}{1.7 \times 2.01} = 4.51 \times 10^{-2} S cm^{-1}$

6 LE:  $\sigma = \frac{l}{RA} = \frac{0.0466}{1.7 \times 2.01} = 1.36 \times 10^{-2} S cm^{-1}$

7 where  $l$ ,  $R$  and  $A$  represent the thickness, the bulk resistance and the test area of hydrogel  
8 electrolyte, respectively.<sup>1</sup>

9

10

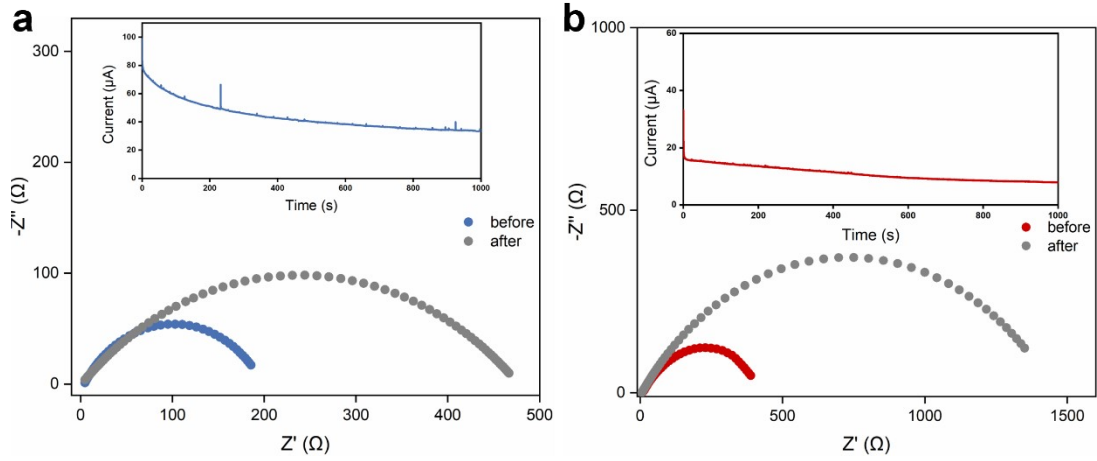

1

2 **Fig. S5 EIS spectra and I-t curve (inserted) of the (a) ISGHE-based and (b) LE-based**  
 3 **Zn||Zn symmetric cell before and after polarization.**

4

5 **Calculation of Zn<sup>2+</sup> transference number:**

6 To calculate the Zn<sup>2+</sup> transference number, the resistances of the Zn||Zn symmetric cell  
 7 before and after the polarization were measured. The transference number was calculated  
 8 according to below equations:

9 ISGHE: 
$$t^+ = \frac{I_s(\Delta V - I_0 R_0)}{I_0(\Delta V - I_s R_s)} = \frac{0.0000336 \times (0.01 - 0.01976)}{0.0000988 \times (0.01 - 0.01567)} = 0.58$$

10 LE: 
$$t^+ = \frac{I_s(\Delta V - I_0 R_0)}{I_0(\Delta V - I_s R_s)} = \frac{0.0000079 \times (0.01 - 0.0132)}{0.0000331 \times (0.01 - 0.0119)} = 0.40$$

11 where  $I_0$  and  $I_s$  represent the initial and steady-state currents, respectively.  $\Delta V$  is the applied  
 12 potential.  $R_0$  and  $R_s$  are the initial and steady-state resistances of the cell determined by  
 13 impedance spectroscopy, respectively.<sup>2</sup>

14

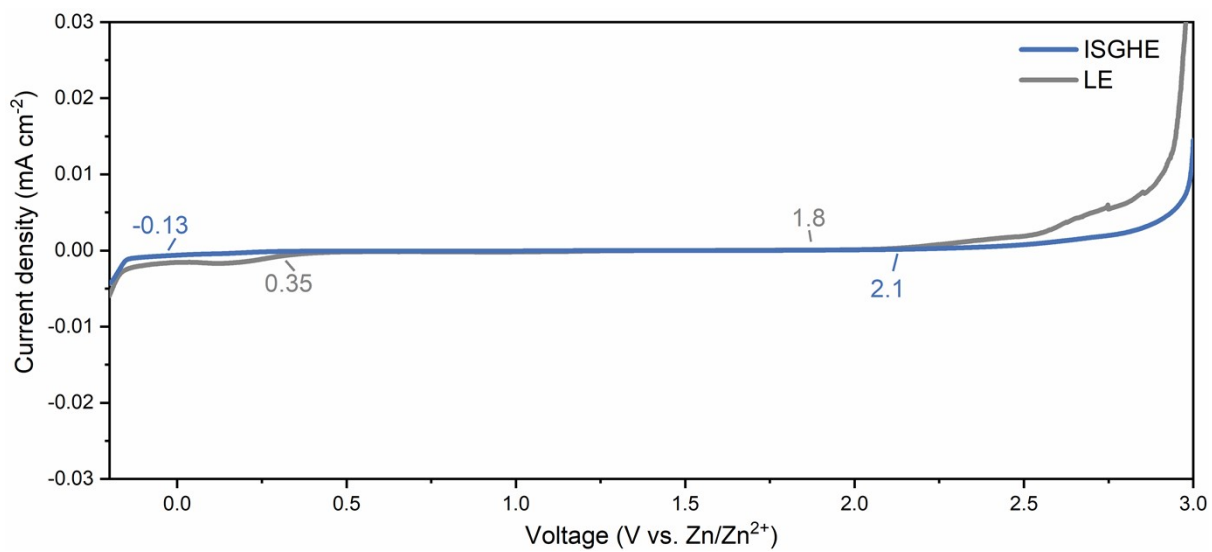

1

2 **Fig. S6 Electrochemical stability window of ISGHE and LE.**

3



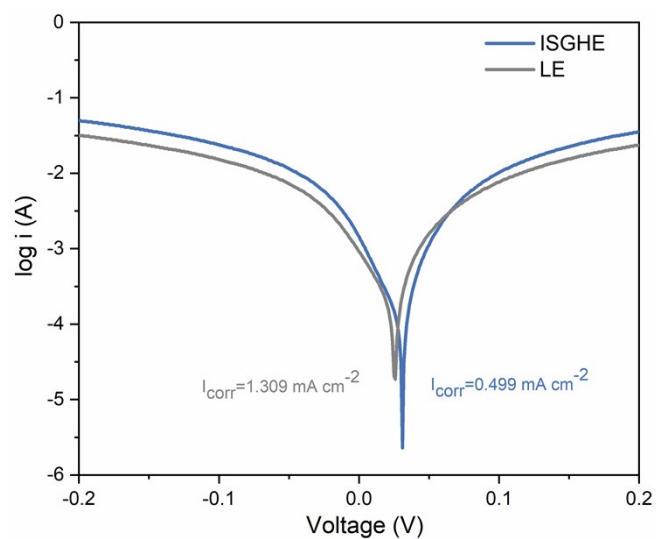

1

2 **Fig. S7 Tafel tests based on Zn||Zn symmetric cells with ISGHE and LE.**

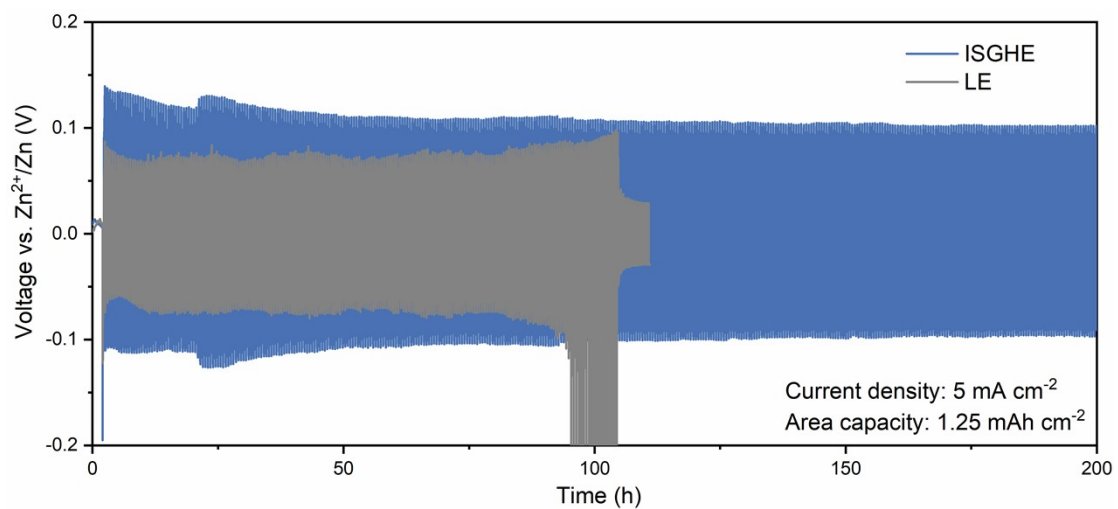

1

2 **Fig. S8 Long-term galvanostatic cycling performance of Zn||Zn symmetric cells based on**  
3 **ISGHE and LE at 5 mA cm<sup>-2</sup> and 1.25 mAh cm<sup>-2</sup>.**

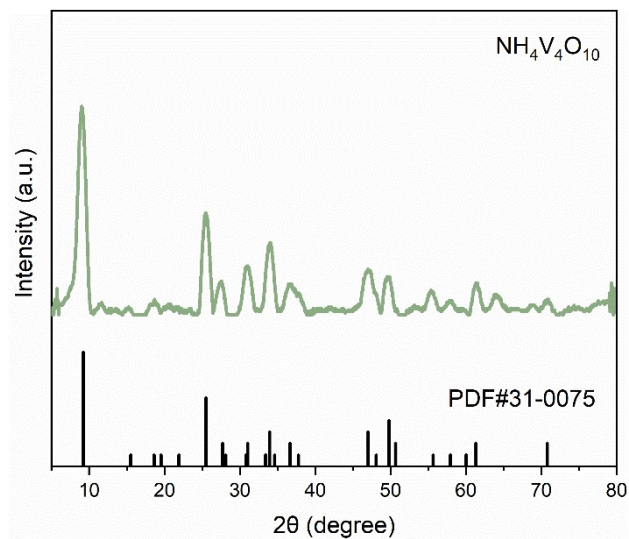

1

2 **Fig. S9 XRD pattern of  $\text{NH}_4\text{V}_4\text{O}_{10}$ .**

3

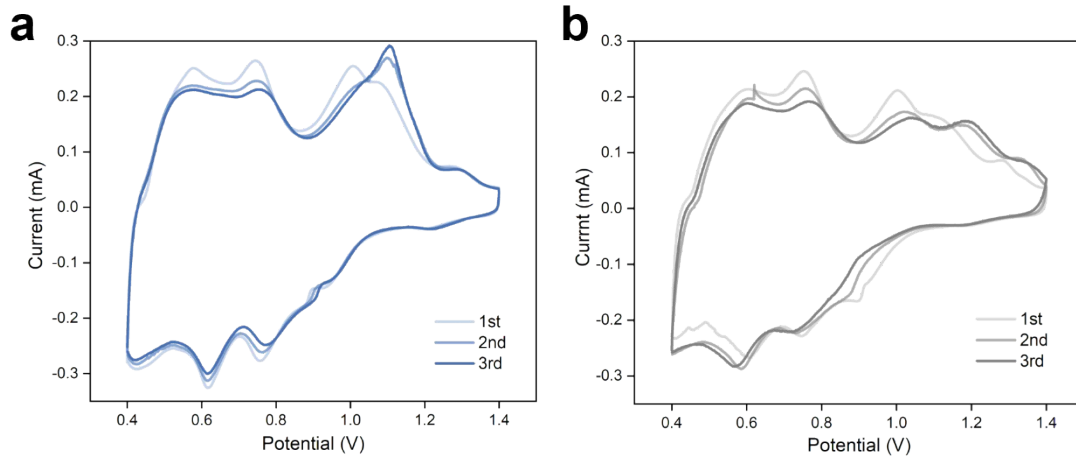

1

2 **Fig. S10 CV curves of the initial three cycles of Zn||NVO cells based on (a) ISGHE and**  
3 **(b) LE at a scan rate of  $0.1 \text{ mV s}^{-1}$ .**

4

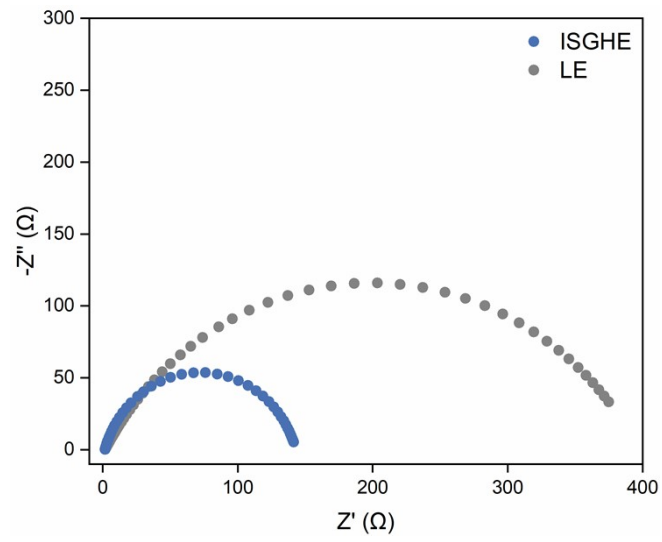

1

2 **Fig. S11 EIS plots of Zn||NVO full cells based on ISGHE and LE in the frequency range**  
3 **of 100 kHz to 0.01 Hz.**

4

5

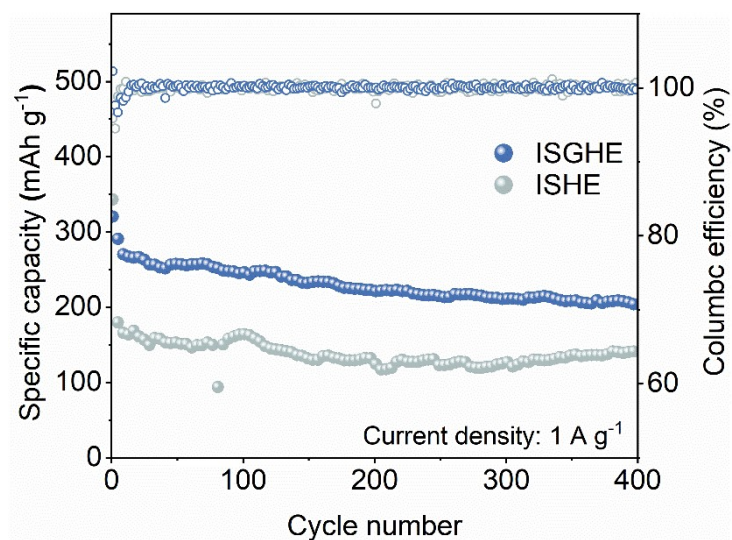

1

2 **Fig. S12 Long-term cycling performance of Zn||NVO full cells based on ISGHE and**  
3 **ISHE at a current density of 1 A g<sup>-1</sup>.**

4

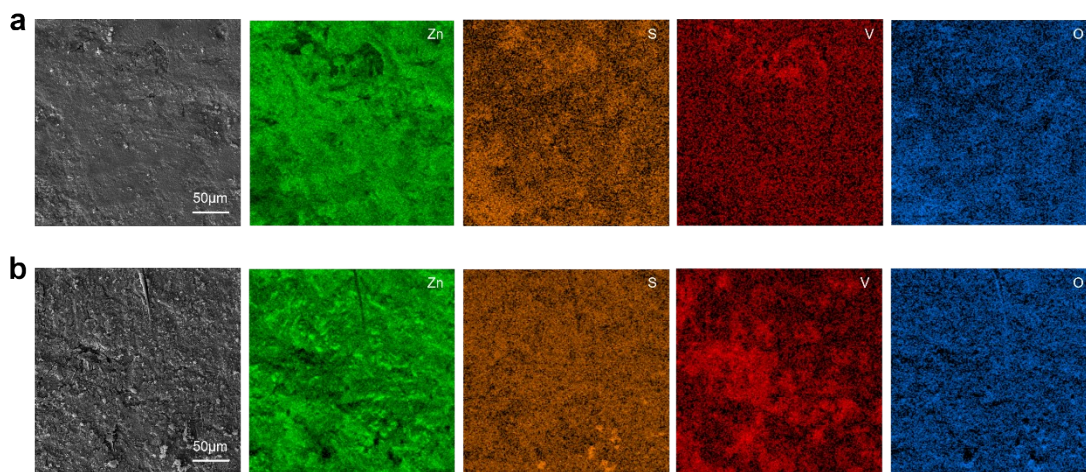

1

2 **Fig. S13 SEM/EDS images of Zn anodes in Zn||NVO batteries based on (a) ISGHE and**  
3 **(b) LE after 50 cycles at 1 A g<sup>-1</sup>.**

4

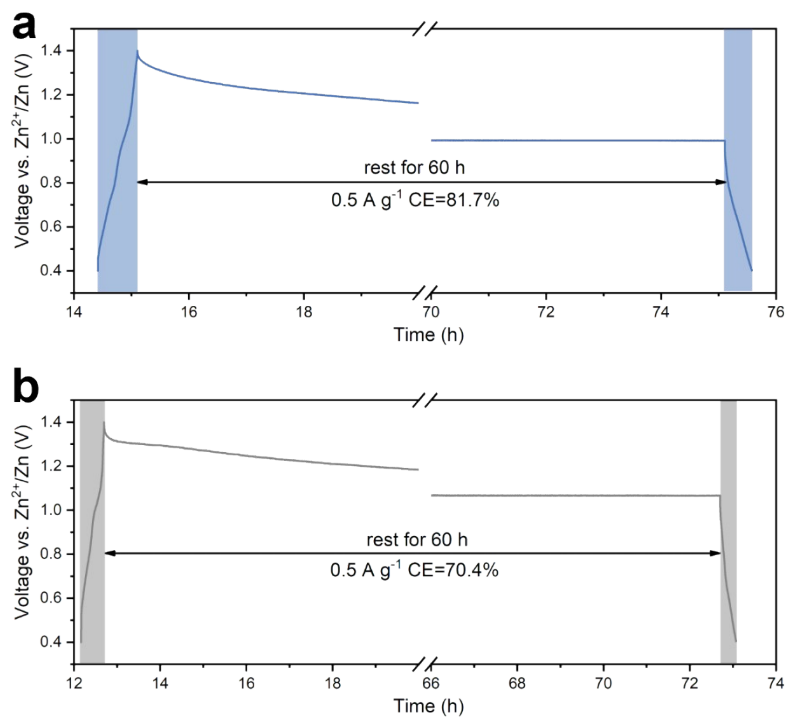

1

2 **Fig. S14 Resting tests of Zn||NVO full cells based on (a) ISGHE and (b) LE.**

3

4



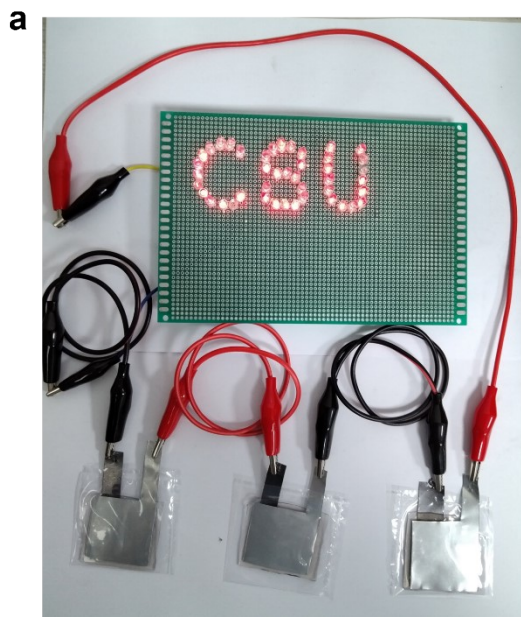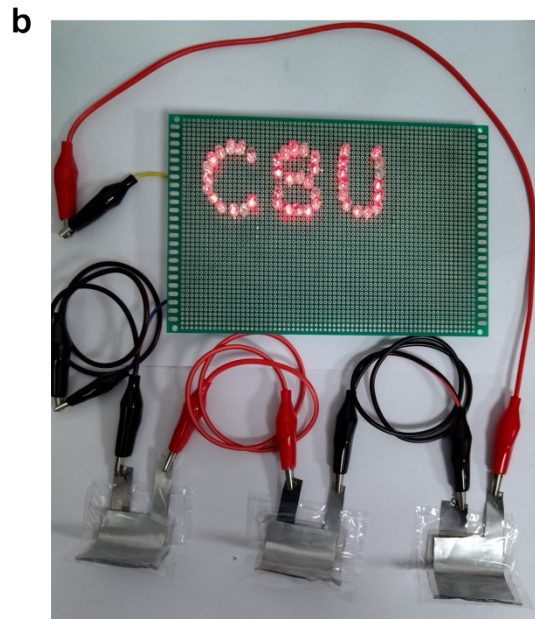

3 **Fig. S15 Optical images of three ISGHE-based pouch cells powering an array of light**  
4 **bulbs at (a) flat and (b) bended states.**

## 1 Reference

- 2 1. H. Li, Z. Liu, G. Liang, Y. Huang, Y. Huang, M. Zhu, Z. Pei, Q. Xue, Z. Tang, Y. Wang,  
3 B. Li and C. Zhi, *ACS Nano*, 2018, **12**, 3140-3148.
- 4 2. Y. Tang, C. Liu, H. Zhu, X. Xie, J. Gao, C. Deng, M. Han, S. Liang and J. Zhou, *Energy*  
5 *Storage Mater.*, 2020, **27**, 109-116.

6
